1           **Functional redundancy in natural pico-phytoplankton**  
2           **communities depends on temperature and biogeography**

3  
4   **Contributing authors:**

5   Duyi Zhong<sup>1</sup>, Luisa Listmann<sup>1,2</sup>, Maria-Elisabetta Santelia<sup>1,2</sup>, C-Elisa Schaum<sup>1,2</sup>

6  
7   **Author affiliations:**

8   <sup>1</sup> University of Hamburg, Institute for Marine Ecosystem and Fisheries Science, 22767  
9   Hamburg

10   <sup>2</sup> Centre for Earth System Science and Sustainability, 20146 Hamburg

11  
12   **Corresponding author**

13   [elisa.schaum@uni-hamburg.de](mailto:elisa.schaum@uni-hamburg.de)

14  
15  
16

17 **Abstract:**

18 Biodiversity affects ecosystem function, but how this relationship will pan out in a changing  
19 world is still a major question in ecology. It remains especially understudied for pico-  
20 phytoplankton communities, which contribute to carbon cycles and aquatic food webs year-  
21 round. Observational studies show a link between phytoplankton community diversity and  
22 ecosystem stability, but there is only scarce causal or empirical evidence. Here, we sampled  
23 phytoplankton communities from two biogeographically distinct (but close enough to not be  
24 confounded by differences in day length and precipitation) regions in the Southern Baltic  
25 Sea, and carried out a series of dilution/regrowth experiments across three assay  
26 temperatures. This allowed us to investigate the effects of loss of rare taxa and establish  
27 causal links in natural communities between species richness and several ecologically  
28 relevant traits (e.g. size, biomass production, and oxygen production), depending on sampling  
29 location and assay temperature. We found that the samples' bio-geographical origin  
30 determined whether and how functional redundancy changed as a function of temperature for  
31 all traits under investigation. Samples obtained from the slightly warmer and more thermally  
32 variable regions showed overall high functional redundancy. Samples from the slightly  
33 cooler, less variable, stations showed little functional redundancy, i.e. function decreased the  
34 more species were lost from the community. The differences between regions were more  
35 pronounced at elevated assay temperatures. Our results imply that the importance of rare  
36 species and the amount of species required to maintain ecosystem function even under short-  
37 term warming (e.g. during heat waves) may differ drastically even within geographically  
38 closely related regions of the same ecosystem.

39

40 **Key words:** Functional redundancy, global warming, pico-phytoplankton communities, Baltic  
41 Sea

42

## 43 **Introduction**

44 When ecosystems lose species, the function and services of the ecosystem may decline. The  
45 insurance hypothesis states that ecosystem stability increases with biodiversity [1]. Evidence  
46 has long been emerging for this to be true across taxa and biomes, spanning heterotrophic and  
47 autotrophic microbial communities to plants to metazoans, i.e. ecosystems with higher  
48 biodiversity tend to be more productive on average regardless of the type of organism under  
49 investigation [2-6]. In a warming world, variation in temperature may shape the biodiversity-  
50 ecosystem function relationship on short and long-term time scales [7,8]. A recent study has  
51 experimentally examined the synergistic effects of warming and biodiversity loss on function  
52 in bacterial assemblages [9], but no comparable data exist for natural phytoplankton  
53 communities. As a consequence, studies on phytoplankton biodiversity and ecosystem function  
54 remain largely observational [2] and usually do not consider loss of biodiversity in interaction  
55 with aspects of climate change (but see [10]) or evolutionary history (but see [11] for  
56 population genetics). Pico-phytoplankton contribute about 20% of phytoplankton primary  
57 production [12], and unlike larger phytoplankton, they do not form blooms, but contribute to  
58 the photosynthesising foundation of aquatic ecosystems all year [13,14]. They show rapid  
59 physiological [15,16] and evolutionary [17,18] responses to changing environments when  
60 studied as single-strain cultures. There is isolated evidence that the speed and mechanism of  
61 evolutionary responses in a changing environment may differ between phytoplankton strains  
62 evolving in isolation and strains evolving in communities, mixed cultures, or multi-genotype  
63 biofilms [19-23]. Comparable experiments have not been carried out for pico-phytoplankton  
64 (but see [24]). As a consequence, we need to conduct manipulative experiments to establish a  
65 better understanding of how the links between pico-phytoplankton community function and  
66 pico-phytoplankton community diversity change with temperature on short- and long-term  
67 timescales. Since natural phytoplankton strains are notoriously difficult to grow in isolation

68 under laboratory conditions, assembling artificial communities from natural phytoplankton  
69 components can be an arduous task. Organisms from culture collections which have already  
70 been shown to grow well in isolation are easier to assemble into communities (e.g.[10]) but  
71 may not reflect well the complex environments that the lineages were originally sampled from.  
72 Therefore, when working with natural assemblages, serial dilution of natural samples can  
73 provide a useful tool to reduce biodiversity to such an effect that rare species are lost, and  
74 common species remain [25,26].

75

76 Here, we investigated the combined effects of transient warming and biogeographic history on  
77 the diversity-function relationship in natural pico-phytoplankton communities. To do so, we  
78 obtained pico-phytoplankton community samples during two cruises of RV ALKOR (AL505  
79 and AL507) on the Southern Baltic Sea in 2018 (see Figure 1 and Table S1). Of the two basins  
80 sampled, the Kiel Bight is characterised by, on average 2 °C higher temperature than the  
81 Bornholm Basin and unpredictable fluctuations in temperature on the timescale of days to  
82 months (Santelia *et al.* in prep – SI document 2). In the Bornholm Basin, fluctuations in  
83 temperature follow a highly predictable pattern governed by seasonality (Santelia *et al.* in prep  
84 – SI document 2). The basins are connected through currents [27], and the regions are  
85 geographically close to each other (see Figure 1) so that we can rule out confounding effects  
86 introduced by e.g. differences in precipitation, day length, and light intensity [28]. By assaying  
87 the effect of species loss on communities across three temperatures within the range of  
88 Southern Baltic Sea spring and summer temperatures [27,28], we can test the contributions of  
89 long-term (comparison of basins) and short-term (assay temperatures) changes in temperature  
90 on key community functions.

91

92

## 93 **Methods**

94 **This is a methods summary. The full methods are available in the supporting**  
95 **information.**

96 We obtained pico-phytoplankton community samples during two RV ALKOR cruises  
97 (AL505 and AL507 respectively) in 2018 (see Figure 1 and Table S1 for sampling dates and  
98 locations) from 5m. Samples were size fractionated to obtain the pico-phytoplankton  
99 community. To rule out effects of parameters other than temperature and diversity during the  
100 experiment, all samples were grown in f/2 media [29] at the salinity of the sampling location.  
101 Community samples grew in semi-continuous batch culture in a common garden at 18°C and  
102 100  $\mu\text{mol quanta m}^{-2} \text{s}^{-1}$  (12:12 light/dark cycle) until used for the experiment. We counted  
103 cell numbers in all samples the flow cytometre, and the flow cytometric fingerprints also  
104 allow for an estimate of phenotypic diversity or trait-level diversity [30] (based on photo-  
105 pigment composition and size [31, ]Figure S2 for details). Samples were then diluted in 10-  
106 fold dilution steps at the appropriate salinity, down to the lowest point of dilution (in theory  
107 containing no more than 1 species or pico-phyoplankton per mL). Six technical replicates of  
108 each sample were left to regrow to  $10^6$  cells  $\text{mL}^{-1}$  at the assay temperatures of 15°C, 18°C,  
109 and 22°C . Then, we re-diluted all samples to the same density and tracked a full growth  
110 curve. Cell size was obtained from the flow cytometre to calculate an estimate of pg carbon  
111 per mL after [32].

112

113 Net photosynthesis rates were obtained when samples were in exponential phase, on PreSens  
114 ® SDR Sensor Dish optodes at  $10^5$  cells  $\text{mL}^{-1}$  in the measurement vials and measured oxygen  
115 production for 15 minutes in the light, and respiration for 15 minutes in the dark.

116

117 We obtained two measures of biodiversity in our samples. One, following CTAB DNA  
118 extractions [33], samples were sent for DNA- meta-barcoding at biome-id, resulting in a  
119 MOTU (meta-barcoding operational taxonomic units) estimate for those samples. Two,  
120 phenotypic diversity [30,31] was assessed using the parameters returned by the flow  
121 cytometre.

122

### 123 **Statistical analysis**

124 All data were analysed in the R programming environment (version 3.5.3.). To analyse the  
125 shape of the growth curves, non-linear curve fitting of a baranyi growth model [34] was  
126 carried out using the ‘nlsLM’ function in the R package, ‘minpack.lm’(version 1.2-1). For  
127 multi-model selection, we computed small sample-size corrected AIC scores (AICc) and then  
128 compared the models by calculating delta AICc values and AICc weights using the “MuMIn”  
129 package (version 1.42-1).

130

### 131 **Results:**

#### 132 Proof of concept

133 MOTU (meta-barcoding operational taxonomic units) analyses revealed that biodiversity (as  
134 species richness) was slightly higher for samples from the Kiel Bight than from the  
135 Bornholm Basin sampling region (see Figure 1C and Figure S1), and roughly in line with  
136 previous studies on Southern Baltic Sea phytoplankton communities [35]. Further, while  
137 diversity was not reduced to a single species in the most dilute samples, MOTU data  
138 confirmed that i) the most dilute samples were on average  $10^5$  times less species-rich than the  
139 least dilute samples, ii) MOTU diversity scaled with phenotypic diversity (Figure S1) and  
140 finally, that diversity once established by dilution, did not change significantly throughout the  
141 time of the growth curve (Figure S2)

142

143 Assay temperature and biogeography explain differences in functional redundancy

144 We consider a result to be in line with high functional redundancy, when a function - such as  
145 biomass production or net photosynthesis - does not change significantly across levels of  
146 species richness. This results in slopes across dilution steps (i.e. species richness) that are  
147 equal or close to zero. When a function declines with species richness, we assume low  
148 functional redundancy. In these cases, the slope of trait value as a function of species richness  
149 is *positive*. We report the steepness of these slopes across three assay temperatures in Figure  
150 2 (Table S2 for slopes, and Tables S3 to S5 for model selection and output).

151

152 Across dilutions, temperature had a significant impact on biomass (Figure S3, likelihood ratio  
153 test comparing models with and without ‘temperature’:  $\Delta$  d.f. = 4,  $\chi^2 = 382.71$ ,  $P < 0.0001$ ,  
154 Table S3). When communities lost rare species, biomass production did not change  
155 significantly in the samples from the Kiel Bight ( Figure 2A). Biomass production in samples  
156 from the Bornholm Bight samples rapidly decreased when rare species were lost, resulting in  
157 positive slopes (Figure S3, Figure 2A, likelihood ratio test comparing models with and  
158 without ‘region’:  $\Delta$  d.f. =2,  $\chi^2 = 185.23$ ,  $P < 0.0001$ , Table S3).

159

160 Changes in biomass were driven by a change in cell number and a change in cell volume  
161 across dilution steps, with a trend for smaller cells at higher species richness (Figure 2B, C,  
162 Figure S4, S5, Table S2, S4). Cell volume decreased with temperature (likelihood ratio test  
163 comparing models with and without ‘temperature’:  $\Delta$ d.f. = 2,  $\chi^2 = 382.70$ ,  $P < 0.0001$ , Figure  
164 2C, Table S4). While cells in samples from the cooler, more stable, Bornholm Basin were on  
165 average less reactive to temperature in terms of cell size, the effect of losing rare species was  
166 stronger here than in samples from the Kiel Bight and cell size rapidly increased as species

167 richness decreased (likelihood ratio test comparing models with and without ‘region:  $\Delta$ d.f. =  
168 2,  $\chi^2 = 223.68$ ,  $P < 0.0001$ , Figure 2 C, Table S4)

169

170 Net Photosynthesis rates (NP) per cell followed a similar trend to biomass (Figure 2D, Figure  
171 S6, Table S5 for model selection and output): assay temperature altered community NP  
172 depending on dilution and sampling origin. Samples from the Kiel region were overall more  
173 photosynthetically active than those from the Bornholm region (likelihood ratio test  
174 comparing models with and without ‘region’:  $\Delta$  d.f. = 3,  $\chi^2 = 21.63$ ,  $P < 0.0001$ , Figure 2D,  
175 Figure S6, Table S5), especially at the warmer temperatures (likelihood ratio test comparing  
176 models with and without ‘temperature’:  $\Delta$  d.f. = 1,  $\chi^2 = 85.47$ ,  $P < 0.0001$ , Figure 2D Figure  
177 S6, Table S5). NP in samples from the Kiel region showed no clear trend with dilution. In  
178 samples from the Bornholm region, on the other hand, responses of NP to temperature were  
179 overall less pronounced, but were strongly influenced by species richness, with the full  
180 community samples photosynthesising nearly 1.5 times (per cell) as much as the samples  
181 with the lowest species richness.

182

### 183 **Discussion**

184 Our investigations of the link between species richness and traits relevant for ecosystem  
185 services showed that the steepness of the biodiversity-function slope hinged on the  
186 communities’ evolutionary histories as well as on short-term (ca 20 generations) changes in  
187 temperature and fit well within the theoretical and observational general framework of  
188 biodiversity/ecosystem function studies [2-5]. The effect of temperature modulating the  
189 strength of the diversity/function relationship was the most pronounced for samples originating  
190 from a cooler, less variable region, in line with theory predicting that regions that are more  
191 variable should contain a greater number of taxa with more variable tolerance thresholds [36].

192



193 Overall, our findings are also in accordance with the literature on experimentally assembled  
194 communities in microcosms, where the researchers found that a decline in productivity was  
195 more pronounced at rising temperatures in phytoplankton and bacteria ([10] and [9]  
196 respectively). We make the case that this pattern of declining productivity due to species loss  
197 being enhanced at higher temperatures may be conserved across environments as diverse as  
198 laboratory conditions and natural community samples. This may also mean that results  
199 obtained from assembling artificial communities reflect results found in natural assemblages  
200 well in direction, and possibly in magnitudes of responses. We specifically find that as species  
201 are lost from samples with a history of comparatively cooler average temperatures and highly  
202 predictable seasonal variation, the community rapidly shows a decrease in net photosynthesis  
203 rates, biomass production, and – unlike in experimental assemblages [10] - an increase in cell  
204 size. Changes in the biodiversity–ecosystem function relationship were thus strongly linked to  
205 size-dependent turnover in community composition, but it is unclear whether this is a cause or  
206 a consequence of the other observed patterns. We can only speculate about the underlying  
207 mechanisms. While it is possible that competition for resources is stronger in a mixed  
208 community, and that this pressure is relieved once most species are lost from the system, our  
209 samples were kept in full media, and the pattern was obvious during exponential phase already  
210 (Figure S7). It is thus unlikely that competition for nutrients, light, or space, was the main  
211 factor here. Neither can the pattern be explained by the larger cells’ being more common in the  
212 original samples (which do have slightly higher variation in cell size than very dilute samples)  
213 and therefore more likely to remain present after dilution. The pattern may be driven by  
214 interactions beyond competition, e.g. types of facilitation [37], or a more general trend for trait  
215 variability and biodiversity being intertwined [38]. It remains to be seen to which degree the  
216 patterns we observed here are also driven by interactions with their associated bacteria. The  
217 latter may have different nutrient requirements that are not met in the same way by our culture

218 media, which may in turn affect how they interact with and shape the phenotypes of the  
219 phytoplankton species.

220

221 Irrespective of the reasons underlying the shift in cell size we observed here, the contribution  
222 of the very small pico-phytoplankton cells to total phytoplankton biomass in the ocean has  
223 been shown to increase with temperature [39] and changes to size distribution in scenarios  
224 where warming and loss of biodiversity interact may have unpredictable impacts on the  
225 function of phytoplankton ecosystems [40]

226

227 While biodiversity manipulation by dilution has limitations (e.g. diversity and species identity  
228 can never be fully disentangled, dilution introduces quasi-random differences in beta diversity),  
229 these apparent disadvantages have potential important ecological implications as they allow us  
230 to specifically investigate the importance of rare taxa, rather than random species loss.

231

232 The Baltic Sea is generally low in species due to its characteristic brackish waters. To rule out  
233 that our results are typical for regions where biodiversity (as richness) is low to begin with, it  
234 would be necessary to carry out comparable studies across systems that vary in their initial  
235 species compositions. Together, such data will further improve our understanding of the  
236 relationship between diversity and ecosystem function at the foundation of warming aquatic  
237 ecosystems.

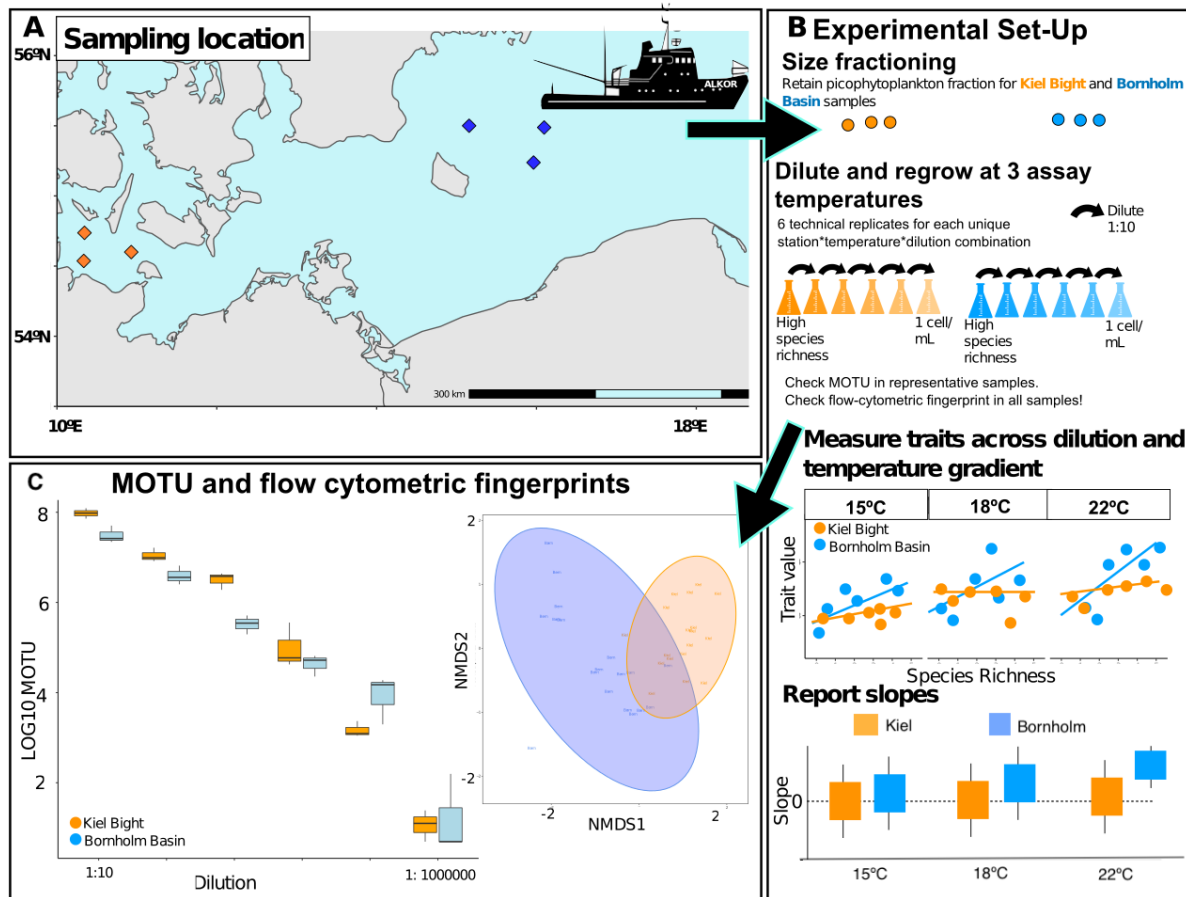

238  
239

240 Figure 1: Overview of sampling locations, experimental set-up, and assessment of species richness  
 241 via meta-barcoding and flow cytometry. A) sampling locations: We took samples in two  
 242 biogeographically distinct regions of the Southern Baltic Sea: the Kiel Bight (KB, orange squares),  
 243 and the Bornholm Basin (BB, blue squares) (Table S1). B) Set up and data-processing: The pico-  
 244 phytoplankton fraction was obtained through size fractionation on board. Upon returning to the  
 245 Institute for Marine Ecosystem and Fishery Science Hamburg (IMF), we established six technical  
 246 replicates per community for each dilution across the three assay temperatures (15°C, 18°C,  
 247 and 22°C). We report the slopes of three traits across the dilution steps for each region\*assay  
 248 temperature combination. C) Proof-of-concept via meta-barcoding and flow cytometry: To test our  
 249 experimental design, we obtained MOTUs (Meta-barcoding Operational Taxonomic Units) and flow  
 250 cytometric fingerprints (based on size and photopigment composition). While there were some  
 251 regional differences in initial MOTU composition, those were overall not significant. (Figures S1 and  
 252 S2).

253

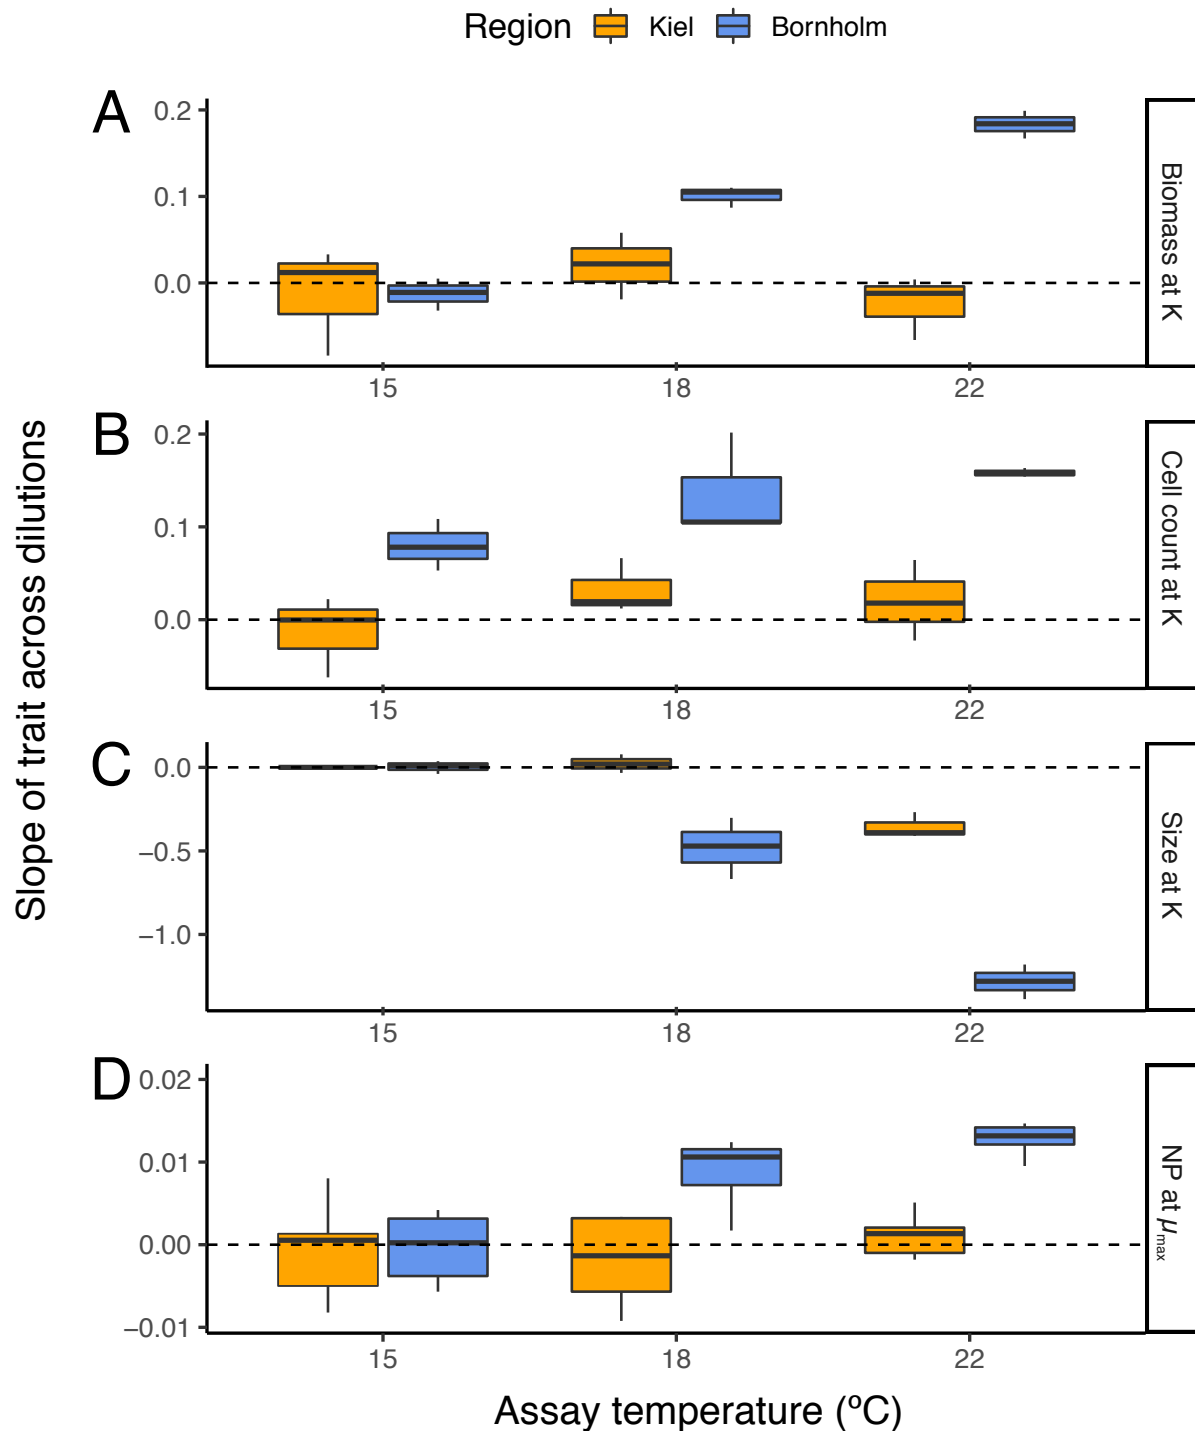

254

255

256

257

258

259

260

261

262

263

264

**Figure 2: Steepness of slopes for traits across dilution gradients** (see Figures S3 to S6 and Table S2 for full slopes). The dashed line indicates a slope of 0, indicating high functional redundancy, i.e. the trait does not change significantly as rare species are lost. A positive slope indicates low functional redundancy, i.e. function decreases as species are lost. A negative slope also indicates that function changes with species richness, and specifically shows that a trait value decreases as species richness increases. **A:** Biomass produced at carrying capacity is stable across dilution steps and temperatures for samples from the Kiel Bight (high functional redundancy), however, there is low functional redundancy in samples from the Bornholm Basin, especially under warming. **B:** Cell count ( $\text{mL}^{-1}$ ) at carrying capacity. Cell count followed the same pattern as overall biomass. **C:** Cell size at carrying

265 capacity. Average cell diameters were independent from dilution at 15°C for samples from  
266 either region, but cells became smaller faster with temperature in the full communities as  
267 compared to low species richness samples. This effect was more pronounced for samples  
268 from the Bornholm Basin. **D**: Net Photosynthesis (NP) across dilution steps during  
269 exponential growth showed similar patterns as the biomass response. Orange for Kiel Bight  
270 samples, blue for Bornholm Basin samples. The boxplots are displayed as is standard, with  
271 the girdle band indicating the median, and the whiskers extending to the 25th and 75th  
272 percentile. n=6 for each unique combination. This plot only displays significant parameters,  
273 i.e. samples from different seasons have been pooled.

274  
275

276 **Conflict of interest:** The authors declare no conflict of interest.

277

278 **Author contributions:** DZ carried out the experiments. LL and MS retrieved, prepared, and  
279 maintained the phytoplankton cultures. ES conceived the experiment, supervised laboratory  
280 work and handled data analysis. All authors contributed equally to writing the manuscript.

281

282 **Acknowledgements:** We would like to thank Margarethe Nowicki, Richard Klinger, Jens-  
283 Peter Hermann, and the captain and crew of RV ALKOR for support at sea (cruises AL505  
284 and AL507), and Stefanie Schnell for technical assistance in the laboratory at IMF Hamburg.  
285 Samuel Barton, Moritz Aehle, and Paula Franze assisted with the metabolism measurements.

286

## 287 **References**

288

289 1. Yachi, S. & Loreau, M. 1999 Biodiversity and ecosystem productivity in a  
290 fluctuating environment: the insurance hypothesis. *Proceedings of the National  
291 Academy of Sciences* **96**, 1463–1468. (doi:10.1073/pnas.96.4.1463)

292 2. Ptacnik, R., Solimini, A. G., Andersen, T., Tamminen, T., Brettum, P., Lepistö,  
293 L., Willén, E. & Rekolainen, S. 2008 Diversity predicts stability and resource  
294 use efficiency in natural phytoplankton communities. *Proc. Natl. Acad. Sci.  
295 U.S.A.* **105**, 5134–5138. (doi:10.1073/pnas.0708328105)

296 3. García-Palacios, P., Gross, N., Gaitán, J. & Maestre, F. T. 2018 Climate  
297 mediates the biodiversity-ecosystem stability relationship globally. *Proc. Natl.  
298 Acad. Sci. U.S.A.* **115**, 8400–8405. (doi:10.1073/pnas.1800425115)

299 4. Tilman, D., Reich, P. B. & Knops, J. M. H. 2006 Biodiversity and ecosystem  
300 stability in a decade-long grassland experiment. *Nature Publishing Group* **441**,  
301 629–632.

302 5. Vallina, S. M., Cermeno, P., Dutkiewicz, S., loreau, M. & Montoya, J. M. 2017  
303 Phytoplankton functional diversity increases ecosystem productivity and  
304 stability. *Ecological Modelling* **361**, 184–196.  
305 (doi:10.1016/j.ecolmodel.2017.06.020)

306 6. Awasthi, A., Singh, M., Soni, S. K., Singh, R. & Kalra, A. 2014 Biodiversity  
307 acts as insurance of productivity of bacterial communities under abiotic  
308 perturbations. *The ISME Journal* **8**, 2445–2452.

309 7. Haaland, T. R. & Botero, C. A. 2019 Alternative responses to rare selection

- 310 events are differentially vulnerable to changes in the frequency, scope, and  
311 intensity of environmental extremes. *Ecol Evol* **9**, 11752–11761.  
312 (doi:10.1002/ece3.5675)
- 313 8. Starrfelt, J. & Kokko, H. 2012 Bet-hedging-a triple trade-off between means,  
314 variances and correlations. *Biol Rev* **87**, 742–755. (doi:10.1111/j.1469-  
315 185X.2012.00225.x)
- 316 9. García, F. C., Bestion, E., Warfield, R. & Yvon-Durocher, G. 2018 Changes in  
317 temperature alter the relationship between biodiversity and ecosystem  
318 functioning. *Proceedings of the National Academy of Sciences* **115**, 10989–  
319 10994. (doi:10.1073/pnas.1805518115)
- 320 10. Bestion, E., Barton, S., García, F. C., Warfield, R. & Yvon-Durocher, G. 2020  
321 Abrupt declines in marine phytoplankton production driven by warming and  
322 biodiversity loss in a microcosm experiment. *Ecol Lett* **23**, 457–466.  
323 (doi:10.1111/ele.13444)
- 324 11. Rengefors, K., Kremp, A., Reusch, T. B. H. & Wood, A. M. 2017 Genetic  
325 diversity and evolution in eukaryotic phytoplankton: revelations from population  
326 genetic studies. *Journal of Plankton Research* **60**, 24–15.  
327 (doi:10.1093/plankt/fbw098)
- 328 12. Richardson, T. L. & Jackson, G. A. 2007 Small Phytoplankton and Carbon  
329 Export from the Surface Ocean. *Science* **315**, 838–840.  
330 (doi:10.1126/science.1133471)
- 331 13. Worden, A. Z., Nolan, J. K. & Palenik, B. 2004 Assessing the dynamics and  
332 ecology of marine picophytoplankton: The importance of the eukaryotic  
333 component. *Limnol. Oceanogr.* **49**, 168–179. (doi:10.4319/lo.2004.49.1.0168)
- 334 14. Rengefors, K., Logares, R., Laybourn-Parry, J. & Gast, R. J. 2014 Evidence of  
335 concurrent local adaptation and high phenotypic plasticity in a polar  
336 microeukaryote. *Environmental Microbiology* **17**, 1510–1519.  
337 (doi:10.1111/1462-2920.12571)
- 338 15. Barton, S., Jenkins, J., Buckling, A., Schaum, C.-E., Smirnov, N., Raven, J. A.  
339 & Yvon-Durocher, G. 2020 Evolutionary temperature compensation of carbon  
340 fixation in marine phytoplankton. *Ecol Lett* **522**, 98–12. (doi:10.1111/ele.13469)
- 341 16. Schaum, E., Rost, B., Millar, A. J. & Collins, S. 2012 Variation in plastic  
342 responses of a globally distributed picoplankton species to ocean acidification.  
343 *Nature Climate Change* **2**, 1–5. (doi:10.1038/nclimate1774)
- 344 17. Heath, S., Knox, K., Vale, P. & Collins, S. 2017 Virus Resistance Is Not Costly  
345 in a Marine Alga Evolving under Multiple Environmental Stressors. *Viruses* **9**,  
346 39–18. (doi:10.3390/v9030039)
- 347 18. Schaum, C. E. & Collins, S. 2014 Plasticity predicts evolution in a marine alga.  
348 *Proceedings of the Royal Society B: Biological Sciences* **281**, 20141486–  
349 20141486. (doi:10.1098/rspb.2014.1486)

- 350 19. Collins, S. 2010 Competition limits adaptation and productivity in a  
351 photosynthetic alga at elevated CO<sub>2</sub>. *Proceedings of the Royal Society B:*  
352 *Biological Sciences* **278**, 247–255. (doi:10.1098/rspb.2010.1173)
- 353 20. Schaum, C. E. 2018 Enhanced biofilm formation aids adaptation to extreme  
354 warming and environmental instability in the diatom *Thalassiosira*  
355 *pseudonana* and its associated bacteria. *Limnol. Oceanogr.* **3**, e1601475–20.  
356 (doi:10.1002/lno.11050)
- 357 21. Wolf, K. K. E., Romanelli, E., Rost, B., John, U., Collins, S., Weigand, H. &  
358 Hoppe, C. J. M. 2019 Company matters: The presence of other genotypes alters  
359 traits and intraspecific selection in an Arctic diatom under climate change.  
360 *Global Change Biol* **25**, 2869–2884. (doi:10.1111/gcb.14675)
- 361 22. Bach, L. T., Lohbeck, K. T., Reusch, T. B. H. & Riebesell, U. 2018 Rapid  
362 evolution of highly variable competitive abilities in a key phytoplankton species.  
363 *Nature Ecology & Evolution* **2**, 611–613.
- 364 23. Listmann, L., Hattich, G. S. I., Matthiessen, B. & Reusch, T. B. H. 2020 Eco-  
365 evolutionary interaction in competing phytoplankton: genotype sorting likely  
366 explains dominance shift and species responses to CO<sub>2</sub>.  
367 *bioRxiv*, 2020.03.31.017954.
- 368 24. Collins, S. & Schaum, C.-E. 2019 Diverse strategies link growth rate and  
369 competitive ability in phytoplankton responses to changes in CO<sub>2</sub>  
370 levels. *bioRxiv*, 651471.
- 371 25. Sierocinski, P. et al. 2018 Biodiversity-function relationships in methanogenic  
372 communities. *Molecular Ecology* **27**, 4641–4651. (doi:10.1111/mec.14895)
- 373 26. Philippot, L., Spor, A., Hénault, C., Bru, D., Bizouard, F., Jones, C. M., Sarr, A.  
374 & Maron, P.-A. 2013 Loss in microbial diversity affects nitrogen cycling in soil.  
375 *The ISME Journal* **7**, 1609–1619.
- 376 27. Leppäranta, M. & Myrberg, K. 2009 *Physical oceanography of the Baltic Sea*.  
377 Springer Science & Business Media.
- 378 28. Snoeijs, P., Schubert, H. & Radziejewska, T. 2016 *Biological Oceanography of*  
379 *the Baltic Sea*. 1st edn. Springer Netherlands. (doi:DOI 10.1007/978-94-007-  
380 0668-2\_1)
- 381 29. Keller, M. D., Selvin, R. C., Claus, W. & Guillard, R. R. L. 1987 Media for the  
382 Culture of Oceanic Ultraphytoplankton. *Journal of Phycology* **23**, 633–638.  
383 (doi:10.1111/j.1529-8817.1987.tb04217.x)
- 384 30. Fontana, S., Thomas, M. K., Moldoveanu, M., Spaak, P. & Pomati, F. 2018  
385 Individual-level trait diversity predicts phytoplankton community properties  
386 better than species richness or evenness. *The ISME Journal* **12**, 356–366.
- 387 31. García, F. C., Alonso-Sáez, L., Morán, X. A. G. & López-Urrutia, Á. 2015  
388 Seasonality In Molecular And Cytometric Diversity Of Marine  
389 Bacterioplankton: The Re-Shuffling Of Bacterial Taxa By Vertical Mixing.

- 390 *Environmental Microbiology* **17**, 4133–4142. (Doi:10.1111/1462-2920.12984)
- 391 32. Montagnes, D. J. S., Berges, J. A., Harrison, P. J. & Taylor, F. J. R. 1994  
392 Estimating carbon, nitrogen, protein, and chlorophyll a from volume in marine  
393 phytoplankton. *Limnol. Oceanogr.* **39**, 1044–1060.  
394 (doi:10.4319/lo.1994.39.5.1044)
- 395 33. Fawley, M. W., Phycology, K. F. J. O.2004 In press. A Simple And Rapid  
396 Technique For The Isolation Of Dna From Microalgae1. *Wiley Online*  
397 *Library***40**, 223–225. (doi:10.1046/j.1529-8817.2004.03081.x)
- 398 34. Buchanan, R. L., Whiting, R. C. & Damert, W. C. 1997 When is simple good  
399 enough: a comparison of the Gompertz, Baranyi, and three-phase linear models  
400 for fitting bacterial growth curves. *Food Microbiology* **14**, 313–326.  
401 (doi:10.1006/fmic.1997.0125)
- 402 35. Bunse, C. et al. 2016 Spatio-Temporal Interdependence of Bacteria and  
403 Phytoplankton during a Baltic Sea Spring Bloom. *Front. Microbiol.* **7**, 1460–11.  
404 (doi:10.3389/fmicb.2016.00517)
- 405 36. Norberg, J., Swaney, D. P., Dushoff, J., Lin, J., Casagrandi, R. & Levin, S. A.  
406 2001 Phenotypic diversity and ecosystem functioning in changing environments:  
407 a theoretical framework. *Proceedings of the National Academy of Sciences* **98**,  
408 11376–11381. (doi:10.1073/pnas.171315998)
- 409 37. Morris, J. J., Lenski, R. E. & Zinser, E. R. 2012 The Black Queen Hypothesis:  
410 Evolution of Dependencies through Adaptive Gene Loss. *mBio* **3**, 379.  
411 (doi:10.1128/mBio.00036-12)
- 412 38. Menden-Deuer, S. & Rowlett, J. 2014 Many ways to stay in the game: individual  
413 variability maintains high biodiversity in planktonic microorganisms. *Journal of*  
414 *The Royal Society Interface* **11**, 20140031–20140031.  
415 (doi:10.1098/rsif.2014.0031)
- 416 39. Morán, X. A. G., López-Urrutia, Á., Calvo-Díaz, A. & LI, W. K. W. 2010  
417 Increasing importance of small phytoplankton in a warmer ocean. *Global*  
418 *Change Biol* **16**, 1137–1144. (doi:10.1111/j.1365-2486.2009.01960.x)
- 419 40. Marañón, E. 2015 Cell Size as a Key Determinant of Phytoplankton Metabolism  
420 and Community Structure. *Annu. Rev. Marine. Sci.* **7**, 241–264.  
421 (doi:10.1146/annurev-marine-010814-015955)
- 422
